# Supplementary material for: Antibacterial and anti-biofilm activities of thiazolidione derivatives against clinical staphylococcus strains
Source: PubMed Central journal article supplement — Emerg Microbes Infect. 2015 Jan 7;4(1):e1–. doi: 10.1038/emi.2015.1 (PMC4317670; doi:10.1038/emi.2015.1), 2015-01-07
Supplement: emi20151x2.pdf [file emi20151x2.pdf]

**Supplemental Table S2 Antibiotic resistance profile of the clinical staphylococcal isolates tested in this study**

| Antibiotics <sup>a</sup> | MSSE (n=24) | MRSE (n=44) | MSSA (n=40) | MRSA (n=55) |
|--------------------------|-------------|-------------|-------------|-------------|
|                          | NO (%)      | NO (%)      | NO (%)      | NO (%)      |
| Penicillin               | 19 (79.1)   | 44 (100)    | 39 (97.5)   | 55 (100)    |
| Tetracycline             | 6 (25)      | 12 (27.2)   | 7 (17.5)    | 36 (65.4)   |
| Erythromycin             | 10 (41.6)   | 38 (86.3)   | 11 (27.5)   | 47 (85.4)   |
| Levofloxacin             | 2 (8.3)     | 11 (25)     | 4 (10)      | 36 (65.4)   |
| Gentamycin               | 2 (8.3)     | 17 (38.6)   | 12 (30)     | 37 (67.3)   |
| Rifampicin               | 1 (4.1)     | 7 (15.9)    | 1 (2.5)     | 18 (32.7)   |
| SMZ-TMP                  | 7 (29.1)    | 22 (50)     | 7 (17.5)    | 19 (34.5)   |
| Teicoplanin              | 0 (0)       | 0 (0)       | 0 (0)       | 0 (0)       |
| Vancomycin               | 0 (0)       | 0 (0)       | 0 (0)       | 0 (0)       |

<sup>a</sup> Drug resistance tests were performed by the disk diffusion (K-B) method.
